# Supplementary material for: Vestibular Nerve Function In Patients With Type 2 Diabetes Detected By Vestibular Evoked Myogenic Potentials
Source: Research Square preprint supplement (doi:10.21203/rs.3.rs-1296202/v1), 2022-02-21
Supplement: Supplementary file 1 [file 4f638418ed5351f26ce1f1c4.xlsx]

## Sheet: 数据集5
group	sex	age	Left N10	Left P15	Left oAMP	Right N10	Right P15	Right oAMP	Light P13	Light N23	Light cAMP	Right P13	Right N23	Right cAMP	BMI	TG	HDL	LDL	TC	UA	HBA1c	FBG	Illness duration
1	1	51	11.2	14.1	3	11.5	16.3	1.89	11.9	20.6	248	11.6	21.1	160	20.6	2.31	1.26	1.88	5.31	310	5.1	4.82	0
1	1	50	11.2	13	2.2	11.3	15.4	3.2	10.5	20.1	106	10.8	20.3	139	25.4	3.66	0.94	2.94	4.61	257	5.6	5.53	0
1	1	48	12.1	14.6	2.5	11.5	15.1	2.4	13.1	22.9	72.9	13.3	23.6	114	24.6	0.5	1.5	2.75	4.48	382	4.9	5.03	0
1	0	45	10.1	15.3	2.1	10.7	15.4	0.95	12.7	21.4	150	11.6	21.4	171	20.2	1.16	1.59	3.62	5.77	272	5.4	5.19	0
1	0	47	9.4	13.9	2.5	10.7	13.6	2.4	11.6	20.5	233	11.5	20.9	220	17.7	0.66	1.75	3.37	5	248	4.9	5.01	0
1	1	50	11.1	15	1.82	9.5	14.5	2.6	12.3	22.1	98.3	12.8	20.5	44.5	28.4	1.81	0.83	3.06	4.55	284	5.3	4.93	0
1	0	57	11.1	13.6	0.9	11	13.2	0.47	11.5	22.7	40	11.2	24.1	28.5	24.8	1.61	2.1	5.05	7.46	209	6.2	5.97	0
1	0	47	12	15	1.76	11.9	16	1.1	11.5	23.7	150	12.2	24.1	92.9	21	0.69	1.66	2.33	3.92	188	5.5	5.04	0
1	1	49	11.8	14.4	1.31	11.9	15.3	0.85	12.6	21.2	68.2	11.2	20.1	83.9	24.2	1.95	1.06	7.2	8.98	401	5.9	4.74	0
1	0	46	11.7	15.1	2.1	10.3	15.6	0.93	11.3	20.5	135	11.9	19.7	122	21.2	2.12	1.38	2.77	4.51	242	6.1	5.21	0
1	1	57	11.9	15.2	1.98	11.7	15.6	0.84	12.2	22.8	92.5	12.8	23.7	88.7	22.6	0.9	1.38	2.69	4.15	374	5.9	5.64	0
1	0	51	11.2	15.4	2.1	11.4	15.6	7.1	12.6	20.8	209	12.5	21	278	21.7	0.88	1.56	2.47	3.86	266	5.5	4.98	0
1	0	43	11.2	14.8	1.31	11.3	15	0.88	12.8	23.9	224	12.2	23.5	191	24.7	5.15	0.57	1.05	2.68	316	5.7	4.79	0
1	1	53	11.3	15	1.17	11.5	14.4	0.72	12.7	20.1	168	12.6	19.8	127	23.2	1.87	0.84	3.12	4.78	362	5.4	4.8	0
1	0	49	11.3	15.5	2.8	10.7	15.6	1.03	13	21.5	84.5	12.2	20.9	86.3	20.8	3.56	1.13	2.67	5.02	306	5.3	4.95	0
1	0	64	10.4	13.1	0.47	10.2	14	0.96	12.6	23.2	83.7	12.8	22.3	34.4	21.7	0.9	1.94	3.11	5.14	309	5.6	4.92	0
1	1	49	11.7	15.1	1.75	11.8	16.2	1.47	12.7	21.4	117	12.1	22.3	137	21.7	1	1.37	2.41	3.99	225	5.5	4.52	0
1	0	54	10.9	15	1.53	10.7	13.5	0.78	10.9	21.1	87.6	10.1	22.1	92.3	23.4	6.14	1.16	2.71	6.36	278	5.9	6.22	0
1	0	49	11.7	13.6	1.02	11.5	13.9	1.18	13.6	22.3	59.7	13.1	22.3	97.8	22.1	1.49	1.43	2.71	4.49	266	5.7	4.68	0
1	1	56	10	12.4	1.86	10.1	13	0.73	12.4	22.5	179	12.3	21.7	226	23.6	1.76	0.62	1.81	3.05	422	5.9	5.13	0
1	1	53	12.9	14.4	0.64	12.4	14.6	2.7	10.2	20.1	93.6	10.7	20.1	180	22.6	1.57	0.66	1.96	3.2	187	5.3	4.97	0
1	1	59	12.7	14.6	0.42	11.9	14.7	0.92	12.2	23.7	83.2	12.9	25.7	49.3	23.2	1.07	0.92	2.65	3.84	290	6.3	4.98	0
1	1	56	11.7	14.5	1.24	11.8	13.9	1.37	13.1	22.1	57.4	13.1	21.6	76.1	24.6	1.86	1.71	5.81	7.8	351	5.6	4.76	0
1	1	68	10.9	14.3	3.8	11	12.3	0.53	11.6	23	11.8	11.9	22.7	195	23.8	1.66	1.23	2.25	4.42	265	5.7	5.8	0
1	0	59	10.6	15.5	3.5	11.1	15.4	2.8	10.6	20.3	233	11.3	21.9	124	19.8	0.62	1.76	2.39	3.96	232	6.1	4.62	0
1	1	53	11.1	15.9	1.09	11.7	15.9	0.29	12.8	22.6	88.4	12.9	23.4	81.8	20.1	1.43	1.09	2.19	3.5	464	5.9	5.23	0
1	1	62	11	15.8	0.94	11.1	16.4	0.63	10.2	20.8	79.8	10.6	19.2	94.7	24.3	1.56	0.63	3.12	4.83	420	5.8	4.99	0
1	0	54	10.4	14.3	1.64	10.4	15.6	0.93	11.4	21.8	43.9	11.2	22.7	53.7	21.6	1.23	0.98	2.74	4.85	369	5.2	4.74	0
1	1	55	11.9	15.6	2.6	11.7	15.8	1.96	11.1	20.9	107	11.5	21.3	65.4	22.1	1.25	1.42	2.89	4.41	293	5.6	5.84	0
1	0	48	11.8	15.3	3.1	11.7	16.3	2.1	11.5	20.9	155	11.7	20.5	95.2	22.2	1.02	1.63	2.92	4.58	219	4.8	4.7	0
1	0	47	11.1	15.6	0.98	11	16.2	2.2	11.5	23.9	116	12.1	23.2	144	22.4	1.04	0.87	2.78	3.48	207	5.2	4.69	0
1	0	53	11.5	14.8	5.6	11.6	15.2	2.1	13.1	22.3	74.8	13.3	21.9	86.7	23.5	1.66	0.92	1.54	2.76	235	5.5	4.86	0
1	1	50	11.6	15.3	1.68	11.4	15.8	1.5	11.1	20.4	135	11.1	20	103	24.1	1.1	1.68	1.83	1.05	199	5.9	4.8	0
1	0	51	10.7	15.3	1.11	10.6	15.4	1.52	12.8	22.1	185	12.8	21.2	177	20.6	2.3	1.54	3.12	5.45	230	5.7	4.6	0
1	1	44	11.1	15.5	0.45	11.1	14	0.48	11.4	21.7	40.9	11.9	22.8	42.8	24.6	2.2	1.32	2.27	4.38	619	5.6	6.2	0
1	1	55	13.2	14.7	1.14	12.8	15.5	2.6	12	20.8	113	11.7	21.4	135	24.1	1.08	1.02	3.25	4.65	321	5.2	5.04	0
1	1	61	12.7	15.2	1.09	11.7	15.2	2.1	12.7	21.7	148	12.3	21.2	203	23.8	2.71	1.39	2.14	4.17	259	6.1	6.02	0
1	1	56	12	14.6	1.7	10.6	15.9	1.3	13.2	21.9	88.7	13.4	20.7	104	23.6	1.34	1.05	3.34	4.79	430	6.2	6.13	0
1	0	51	12.6	15.5	1.56	10.7	15.9	1.95	12.1	20.1	58.1	12.3	21.5	65.5	20.5	0.52	1.92	3.12	4.96	326	5.5	4.77	0
1	0	53	9	15.7	1.59	9.2	15.2	2.5	11.2	22.1	147	12.1	23.2	63.9	19.6	0.78	1.44	1.77	3.32	173	5.7	4.92	0
1	1	52	11.4	16.5	1.32	11.9	17	1.43	12.1	22.1	57	12.3	21.7	73.5	23.2	1.14	1.88	3.64	5.52	307	5.9	4.96	0
1	1	42	9.7	15.8	0.71	9.6	15.7	0.3	13.2	23	69.8	12.6	23.2	64.7	17.5	1.23	0.9	4.75	5.49	286	5.5	4.47	0
2	1	53	9.6	15.6	1	10.3	14.2	0.72	11.4	20.8	59.8	11.7	19.4	31.9	24.2	1.05	1.08	1.85	3.16	309	5.8	5.92	1
2	1	61	11.6	15	2.4	9.7	13.7	1.46	12.7	21.6	78.1	12.1	22.5	50.4	23.1	0.9	1.54	3.52	5.47	339	6.4	7.84	1
2	1	50	11.2	16.3	3.4	11.7	15.4	5.7	13.8	22.5	248	13.6	23.1	185	23.5	1.6	1.57	4.21	6.18	322	8	8.01	2
2	1	53	9.5	13.4	0.93	11.9	14.6	2.2	11.8	23.1	69.4	12	23.2	113	20.6	1.53	1.45	4.42	5.77	307	7.1	6.21	10
2	0	49	11.6	16.4	1.72	10	16.1	1.36	12.6	21.8	40.1	12.1	22.4	79	22.4	1.8	0.49	1.62	3.35	522	7.9	7.23	0.003
2	1	65	10.9	17.5	1.67	11.1	17.6	0.82	13.6	23.2	73.2	13.5	25.2	38.8	20.7	1.4	0.9	3.1	4.18	425	10.3	11.99	0.027
2	1	65	11.6	16.8	1.61	11.3	16.4	1.4	13.1	21.7	44.7	14.7	21.5	23.8	23.4	1.72	1.06	2.84	4.42	352	12.3	16.12	0.014
2	0	65	11	14.5	1.91	10	15.2	2.3	12.6	22.6	22.5	11.8	21.9	49.4	24.4	3.57	0.89	1.64	4.06	566	6.1	9.81	10
2	1	54	11.5	16.2	2	11.1	16	3.7	13.2	21.2	154	12.9	21.1	153	34.5	2.21	0.79	2.56	3.86	351	8	9.39	0.083
2	1	65	9.2	14.7	0.85	7.9	13.5	0.04	10.7	23.4	74.6	11.6	23.9	74.9	23.1	1.73	1.23	3.4	4.92	359	7.4	4.28	5
2	1	65	11.2	15	1.79	10	14.5	1.65	12.5	23.8	52.6	12.1	23.9	66.7	19.5	0.79	1.78	1.63	3.65	422	6.8	7.06	7
2	1	48	11.5	15.4	3	11.8	14.8	3.2	12.5	23	135	12.3	22.1	144	23.8	0.58	1.09	1.45	2.61	233	11.1	10.1	20
2	0	62	11.8	15.3	1.11	11.5	15.4	1.52	11.9	22.6	47.1	12.4	21.9	87.1	29.4	7.63	0.89	2.45	5.55	527	10.5	11.63	0.42
2	1	53	11.7	16.2	1.41	11.8	16.7	1.68	12.3	21.9	91.1	12.8	22.1	93.1	29.8	1.6	1.03	4.01	5.33	384	9.1	7.88	0.019
2	1	73	9.8	14.7	1.1	12.1	14.6	0.63	12.4	20.1	198	13.3	20.1	38.5	21.6	3.35	1.23	5.09	7.15	307	10	15.06	6
2	0	50	11.1	14.4	2.3	11.4	14.2	1.72	11.4	21.4	160	11.7	21.7	201	23.7	0.99	1.34	1.91	3.58	145	13	8.29	5
2	0	51	10	16.3	2.2	11.4	16.3	1.45	10.8	21.3	79.7	11.1	22.2	86	27.7	2.42	0.73	4.14	5.48	351	10.3	6.7	3
2	1	45	9.7	13.6	1.43	13.3	14.8	1.51	13.2	22.1	91.2	12.3	22.3	63.1	20.1	1.42	1.21	4.4	6.26	315	8.9	12.46	7
2	0	69	10.7	13.7	0.59	10.6	14.5	1.15	11.3	20.5	60.1	11.9	19.2	46.5	24.9	1.99	0.83	4.75	5.98	394	7.9	8.82	10
2	1	31	12	15.2	2.3	11.3	16.2	2.5	12.7	20.2	61	12.3	23.4	30.1	30.8	2.12	1.19	2.66	5	317	10.1	16.48	6
2	1	55	11.8	17.9	1.98	12.6	17.7	0.76	12.9	21.5	142	12.7	21.9	99.8	26	2.67	0.88	1.4	3.02	433	9	8.12	2
2	1	59	11.9	13.8	1.18	10.6	13.4	1.31	12.3	20.5	135	12.7	20.9	136	18.6	0.79	1.24	3.05	4.34	194	6.9	5.42	4
2	0	54	11.2	15.1	1.5	11.1	15.1	2.1	12.3	21	80.4	11.8	20.3	76.3	24.6	1.22	0.93	1.89	3.17	235	11.7	5.44	2
2	0	68	9	12.1	1.43	9.2	12.2	1.71	12.9	20.3	38.9	13.2	17.2	28.6	22	0.69	1.99	5.31	7.2	162	7.4	6.57	3
2	1	53	9.9	13.4	1.16	11.7	14.7	1.87	11.8	20.5	111	11.6	19.8	76.3	24.4	1.58	1.09	2.78	4.12	421	6	6.19	4
2	1	52	11.5	15.9	1.53	10.9	16	0.98	12.6	22.7	129	12.7	22.7	133	25.9	1.98	1.08	1.98	3.76	474	6.4	6.97	9
2	0	56	11.5	13.8	0.78	12.1	13.5	0.63	12.3	22.3	116	12.4	22.3	67.9	22.3	1.41	1.25	3.63	5.12	318	11.4	8.15	5
2	0	60	9.6	12.8	0.84	9.8	14.2	2	11.9	23.8	68.7	11.5	23.9	40.3	23.7	0.95	1.27	2.85	4.04	310	7.5	6.93	0.019
2	1	42	11.2	15.7	1.47	9.6	15.3	0.68	12.8	21.3	82.1	12.7	20.7	70.2	23.8	2.49	1.09	2.76	4.63	522	6.4	6.25	0.417
3	1	40	11.8	17.4	1.25	12	17.7	1.65	12.7	22.7	95.5	12.8	21.9	71.7	20.2	1.94	1.26	3.61	5.32	299	11.4	8.94	3
3	0	65	13.1	18.4	1.18	13.4	17.5	1.28	12.5	21.8	20.8	13.8	21.6	35.9	28.6	0.95	1.61	2.41	4.14	213	7.2	7.91	0.333
3	0	64	11.3	18.1	1.04	13	17.8	0.47	12.8	21.2	25.6	13.1	22	38.5	24.5	1.31	1.71	1.82	3.77	374	9.9	7.35	2
3	1	44	11.6	16.3	0.93	11.4	14.5	1.31	11.7	20.7	195	10.9	20.3	128	28.4	4.13	0.91	3.55	5.69	346	8.5	9.43	7
3	1	35	11.3	18.7	2.5	11.5	18.1	1.9	12.7	23.4	137	12.8	22.3	75.2	23.7	2.12	1.18	5.26	6.64	299	7.1	9.08	0.25
3	1	53	12	18.3	2.8	11.2	16.7	3.4	16.4	26.4	177	16.8	26.7	191	27.9	0.99	1.19	3.45	5.09	240	6.8	12.46	8
3	1	32	12.5	17.8	3.7	11.8	17.9	2.6	12.5	21.4	31.5	12.8	21	71.2	23.1	1.74	1.03	2.13	3.73	315	6.9	5.61	1
3	1	60	12.1	17.2	1.29	11.7	17.5	1.26	14.8	25.5	45	15.1	25.4	34.2	22.7	1.94	1.04	3.2	4.79	287	9	9.94	3
3	1	47	13.8	17.3	3.7	13.6	17.6	2.1	16.9	26.5	81.4	17	26.5	83.2	22.8	1.26	0.89	2.36	3.68	400	9	8.68	8
3	0	38	11.3	17.1	2.2	11	16.8	1.73	12.2	23	91	12.9	25.8	150	23.6	1.43	2.84	3.17	4.59	349	10.2	12.63	0.027
3	0	76	11.9	17	0.76	13.3	16.4	1.47	11.2	24.1	76.5	11.7	26.6	85.7	20.8	1.54	1.24	4.35	5.82	308	12.5	13.17	20
3	1	33	11.2	17	5.1	11.2	16.2	6.3	13.7	23.3	64	13.4	22.2	73.5	28.4	1.82	0.74	4.33	5.27	282	10.5	9.09	10
3	1	47	12.1	16.7	1.1	11.7	16.7	1.33	12.1	22.7	59.6	12.5	22.7	75.5	23.5	1.64	1.17	3	4.75	328	7.4	9.33	1
3	1	43	11.8	17.2	1.89	11.1	16.6	0.85	11.9	21.4	92.5	11.5	21.3	145	26.8	1.15	0.77	3.02	4.08	397	12.5	10.72	0.25
3	0	55	11.4	16.8	0.73	11.2	14.8	1.31	12.3	21.3	311	12.1	20.5	145	22.5	2.57	1.27	3.53	5.47	174	7.4	8.11	10
3	0	32	15.2	18.4	0.95	15.1	13.5	1.07	11.8	20	62.8	11.7	22	48.2	23.3	1.18	1.09	2.73	3.81	255	12.1	14.8	0.083
3	0	68	14.1	18.7	1.69	14.7	18.2	0.52	12.9	23	49.3	13	23.5	62	24.3	1.88	1.03	3.6	5.17	281	7.3	7.16	3
3	0	56	13.7	17.3	1.49	12	17.7	0.79	12.5	24.4	51.5	12.9	25.7	67.5	25.7	1.87	1.48	4.56	6.19	308	9.9	13.73	3
3	0	52	12.9	16.1	0.77	12.8	17.8	2	14.7	25.2	56.4	14.5	26.6	61.8	27.7	0.88	1.84	3.77	6.08	252	6.3	5.34	12
3	1	64	13.2	16.2	1.45	13.2	16.6	1.02	12.9	23.7	125	12.5	22.6	109	25.4	1.32	1.18	1.66	3.06	317	5.8	6.62	0.5
3	0	66	13.4	15.9	1.26	12.5	14.5	1.09	14.1	25	61.1	14.7	25.9	93.4	25	0.73	1.39	2.4	3.85	228	6.1	4.32	1
3	1	33	11.3	16.9	2	12.3	16.9	1.26	13.6	23.1	108	14	23.1	68.2	16.7	0.83	1.31	1.28	2.82	248	9.5	5.9	0.333
3	1	53	11.5	15.9	4	11.5	16.4	1.09	12	22.3	130	12	22.6	142	27.5	3.98	0.84	3.05	5.72	451	11.4	6.6	0.016
3	1	61	11.9	16.4	1.04	14.3	20.3	0.63	15.2	26.1	66.4	14.8	26.7	67.5	24.2	2.2	1.37	3.83	5.83	346	8.9	13.37	10
3	0	61	12.7	16.2	2.5	11.8	15.2	2.1	13.9	22.6	48.7	12.6	22.4	50.6	27.2	1.72	1	2.08	3.44	347	7.7	7.46	10
3	1	55	11.7	15.9	0.62	10.9	15.8	0.69	14.7	25.9	99.5	13.2	24.7	148	24.2	2.59	0.75	3.9	5.42	387	5.9	4.15	2
4	0	68	11.7	14	1.08	12.5	14.6	1.73	16	23.2	58.4	17.8	23.5	80.6	20.5	0.99	1.2	2.6	3.9	404	14	11.65	10
4	1	25	12.5	16.1	1.9	11.9	14.3	1.18	16.1	26.1	141	13.5	26.5	112	27.1	1.29	0.98	2.21	3.47	511	12.3	18.1	2
4	0	43	10.3	12	0.46	11.8	14.2	0.3	11.8	26	86.7	12.1	26.1	58.1	22.9	0.76	1.77	3.48	4.93	380	9.7	4.41	20
4	1	43	11.8	14.9	1.35	10.4	14.3	1.47	12.8	21.5	145	13.1	21.7	114	25.7	1.14	0.97	4.48	5.68	170	11.8	10.71	10
4	0	67	14.5	17.9	0.93	14.7	15.4	1.17	13.1	23.4	102	13.7	23.9	101	26.5	1.76	0.89	2.91	4.25	310	13.4	17.07	0.25
4	1	39	11.4	14	1.6	11.7	14.6	1.04	12.5	22.5	92.6	13.6	22.6	99.3	25.6	2.65	0.82	4.09	5.91	457	9.5	7.08	4
4	1	45	11.3	12.9	1.02	12.4	13.9	1.37	12.3	21.3	110	12.2	21.2	108	27.7	1.8	0.92	4.05	4.94	316	8.5	12.59	5
4	0	49	11.7	13.9	0.82	12.3	14.1	0.36	11.8	20.9	200	12.6	21.6	138	21.2	3.02	1.01	3.25	4.78	262	9.8	7.22	10
4	1	39	11.9	14.5	0.46	11.9	14	1.2	12.5	24.3	150	12.9	24	82.9	22.3	0.61	1.84	2.83	4.68	263	6.1	5.23	3
4	0	57	12.6	15.9	2.8	12.9	16.8	1.34	12.6	24.3	109	12.8	24.9	105	26.7	1.92	0.87	3.72	4.95	291	10.7	12.1	1
4	1	35	13	17.8	0.85	13.2	17.3	1.18	11.3	24.5	112	12.7	22.7	127	23.1	0.86	1.53	3.13	5	263	10.8	4.86	10
4	1	57	11.4	15.8	1.95	10.9	15.3	1.49	12.4	24.6	143	12.1	24.4	138	20.2	1.02	1.45	2.95	4.74	365	12.2	6.18	20
4	1	68	12.4	17.5	1.04	12.8	17.8	1.43	14.1	25.8	45.5	14.9	25.4	46.6	25.7	1.44	0.85	2.41	3.8	366	10.3	11.5	10
4	1	59	13.6	17.3	0.84	13	16.5	1.32	15.9	25.7	54.6	16.7	25.5	85.9	27.6	9.25	0.68	3.65	9.33	447	7.1	3.86	3
4	1	62	12	17	2.2	11.7	16.1	0.31	13.8	25.5	87.4	13.6	24.9	80.8	24.4	1.49	1.11	4.81	6.58	438	11.8	8.37	5
4	1	78	11.7	15	1.51	10.4	14.7	0.93	12.9	23.9	113	12.6	23.7	97.9	20.1	0.89	1.44	3.99	5.81	219	16.6	21.17	1
4	1	41	12.8	17.5	1.4	12.9	16.8	1.8	14.1	25.1	71.2	14.1	25.1	116	23.4	1.24	1.42	2.86	4.51	356	10.4	8.93	0.083
4	1	32	11.1	14.8	5.7	11.2	14.5	5.8	13.8	23.9	129	13.3	23.3	208	20.7	3.96	0.97	4.07	6.18	231	12.1	10.85	5
4	0	62	12.9	16.5	1.06	12	16.8	2.6	15.5	26.3	27.6	15.8	26.4	60.4	27.6	3.04	0.95	1.56	3.21	291	6.9	8.05	13
4	1	69	13.6	19.8	7.3	11.9	19.4	3.5	12	24.6	92.7	12.5	25	109	22.5	2.83	1.21	4.47	6.68	340	11.9	15.17	3
4	1	58	12.8	16.9	1	12.6	16.4	0.89	12.3	20.4	39.1	13.3	21.6	46.6	23.4	2.27	1.54	4.78	6.53	471	12.6	23.08	8
4	1	35	11.7	16.9	1.07	11.4	15.9	1.83	13.2	25.1	117	13.8	25.9	132	25.7	1.66	0.8	3.91	5.16	390	12.7	15.2	8
4	1	59	14.5	17.3	0.47	14.7	16.9	0.46	17.5	26.5	87.9	17.2	25.6	95.1	21.9	0.99	1.85	1.8	3.68	320	9.8	9.31	10
4	0	61	11.4	15.8	1.08	12.5	17.5	1.01	13	25.9	48.4	13.3	24.7	37.2	18.8	1.19	1.11	4.97	6.02	420	10.5	20.4	0.038
4	0	51	11.5	15	1.93	12	16.1	2.7	12.7	21.7	57.3	12.2	22	69.3	22.3	1.32	1	3.12	4.39	257	12.3	9.44	10
4	0	34	12.8	16.1	1.63	12.6	16	1.24	13.6	24.1	60	13.9	25.1	60.6	23.7	0.82	0.9	2.78	3.84	252	10.1	8.74	11
4	1	52	11.3	15.1	3.7	11.4	16	1.82	12.4	21	62.4	12.3	21.6	64.7	16.3	0.95	2.08	6.5	8.56	309	15.2	9.79	11
4	1	47	11.7	15.8	1.13	12.6	16	1.6	14.8	24.3	94.1	13.7	23.4	54.9	20.3	1.25	3.04	2.12	5.28	288	13.7	15.99	8
4	1	54	12.7	17.6	4.5	12.5	17.1	1.52	13.5	24.9	81.3	14	24.4	124	24.2	1.93	1.26	4.05	5.65	349	9.8	9.07	20
4	0	55	13.2	18.1	1.25	13.5	16.5	0.8	13	23.5	114	12.7	23.7	77	25.4	1.4	1.77	2.98	4.85	327	12.5	9.28	7
4	1	67	13.9	17.1	1.7	14.1	17.5	1.32	15.6	25.7	161	15.4	25.9	107	23.1	0.87	1.28	2.4	3.7	322	6.9	6.81	5
4	1	61	12.7	15.8	3	12.2	15.3	1.35	12.7	22.8	112	13.3	23.1	128	24	1.11	1.64	1.6	3.54	293	8.5	7.89	6
4	0	52	14	17.3	1.48	14.2	17.4	0.65	15.7	26.4	50.3	15.8	26.3	44.3	18.7	1.33	1.39	4.27	6.2	272	7.1	9.24	0.019
4	1	31	13.5	17.9	1.85	13.7	17.4	2.2	12.8	24.5	241	13.7	24.3	257	16.6	0.79	0.99	3.24	4.52	110	12.4	12.78	8
